# Supplementary material for: Genetic defects of CHM and visual acuity outcome in 24 choroideremia patients from 16 Japanese families
Source: PubMed Central journal article supplement (PMC7522719; doi:10.1038/s41598-020-72623-1), 2020-09-28
Supplement: 41598_2020_72623_MOESM1_ESM.pdf [file 41598_2020_72623_MOESM1_ESM.pdf]

# Genetic defects of *CHM* and visual acuity outcome in 24 choroideremia patients from 16 Japanese families

**Running title:** *CHM* variants in Japanese choroideremia patients

Takaaki Hayashi <sup>1,2</sup>, Shuhei Kameya <sup>3</sup>, Kei Mizobuchi <sup>2</sup>, Daiki Kubota <sup>3</sup>, Sachiko Kikuchi <sup>3</sup>, Kazutoshi Yoshitake <sup>4</sup>, Atsushi Mizota <sup>5</sup>, Akira Murakami <sup>6</sup>, Takeshi Iwata <sup>4</sup>, Tadashi Nakano <sup>2</sup>

<sup>1</sup>Department of Ophthalmology, Katsushika Medical Center, The Jikei University School of Medicine, Tokyo, Japan

<sup>2</sup>Department of Ophthalmology, The Jikei University School of Medicine, Tokyo, Japan

<sup>3</sup>Department of Ophthalmology, Nippon Medical School Chiba Hokusoh Hospital, Chiba, Japan

<sup>4</sup>Division of Molecular and Cellular Biology, National Institute of Sensory Organs, National Hospital Organization Tokyo Medical Center, Tokyo, Japan

<sup>5</sup>Department of Ophthalmology, Teikyo University School of Medicine, Tokyo, Japan

<sup>6</sup>Department of Ophthalmology, Juntendo University Faculty of Medicine, Tokyo, Japan

Corresponding author: Takaaki Hayashi, MD, PhD

Department of Ophthalmology, Katsushika Medical Center

The Jikei University School of Medicine

6-41-2 Aoto, Katsushika-ku, Tokyo 125-8506, Japan

Phone: +81-3-3603-2111, Fax: +81-3-3433-1936

E-mail: taka@jikei.ac.jp

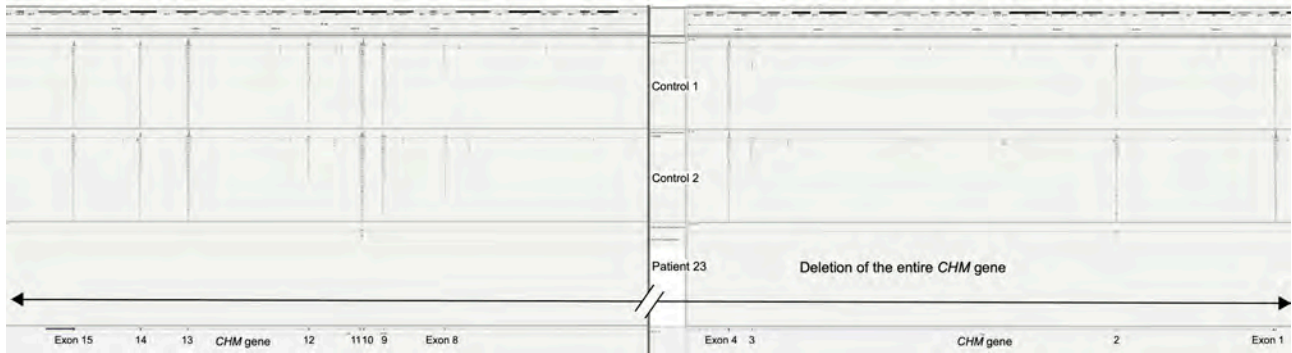

**Supplementary Figure 1 Whole-exome sequencing data of patient 23 and two controls** Whole-exome sequencing revealed an extremely large deletion of probably 5.0 mb encompassing the entire *CHM* gene and other genes (*TGIF2LX*, *CPXCR1*, *KLHL4*, *DACH2*, *MIR1321*, *POF1B*, *SATL1*, *UBE2DNL*) in the vicinity of *CHM*. The Integrative Genomics Viewer visualization of the *CHM* gene region demonstrated a deletion of the entire *CHM* gene (exons 1–15).

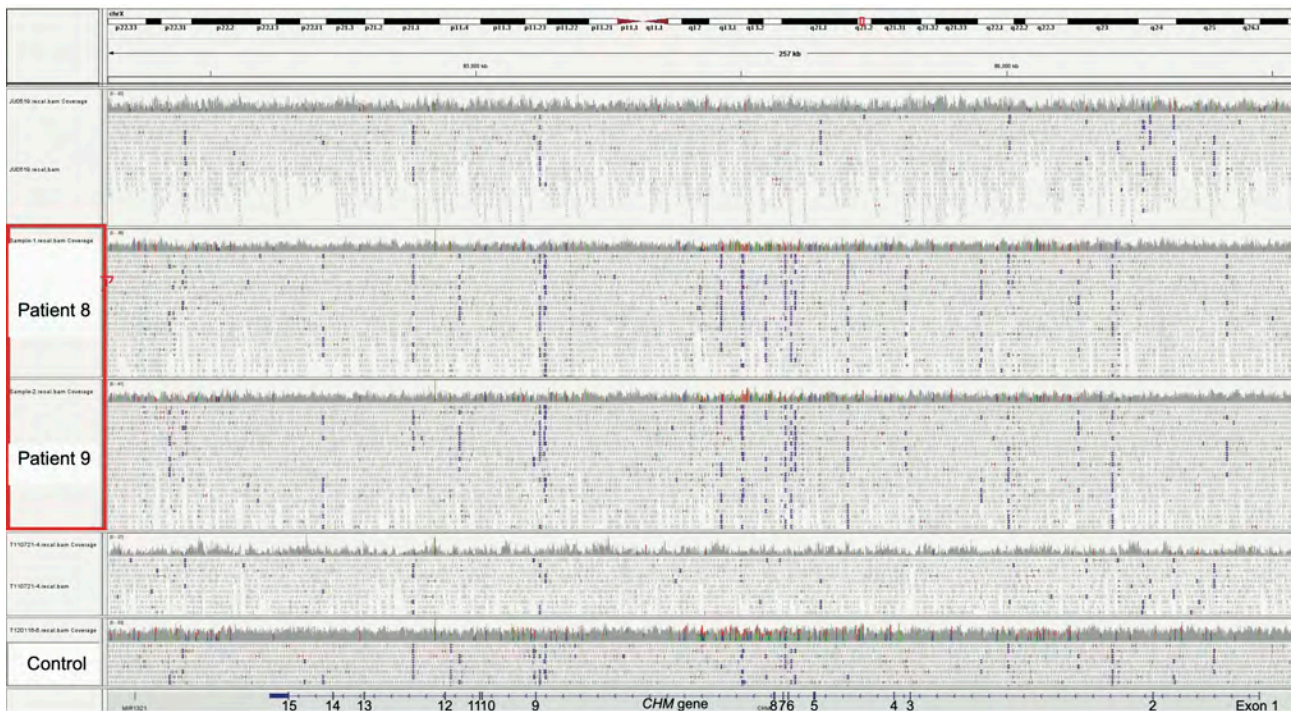

**Supplementary Figure 2 Whole-genome sequencing (WGS) data of the *CHM* gene region for patients 8 and 9 and one control**

The Integrative Genomics Viewer visualization revealed no decrease in read depth of any exons or introns in either patient, indicating no obvious deletion region in the *CHM* gene.
